# Supplementary material for: Transcriptome mechanisms underlying interaction of polystyrene nanoplastics and wheat Triticum aestivum L.
Source: Research Square preprint supplement (doi:10.21203/rs.3.rs-98748/v1), 2020-10-30
Supplement: Supplementary file 1 [file 6bcd31b43f884568f7ffa374.docx]

***Supplementary Information for***

**Transcriptome mechanisms underlying interaction of polystyrene nanoplastics and wheat *Triticum aestivum* L.**

Qixing Zhou a, *, &, Jiapan Lian a,b, &, Weitao Liu a,*, Shuzhen Men c, Jiani Wu a, Yuebing Sun d, Aurang Zeb a, Tianzhi Yang a, Qiying Lena Ma b,*

a Ministry of Education Key Laboratory of Pollution Processes and Environmental Criteria / Tianjin Key Laboratory of Urban Environmental Remediation and Pollution Control, College of Environmental Science and Engineering, Nankai University, Tianjin 300350, China

b Ministry of Education Key Laboratory of Environmental Remediation and Ecosystem Health, College of Environmental Sciences and Resources, Zhejiang University, Hangzhou 310058, China

c Department of Plant Biology and Ecology, College of Life Sciences, Nankai University, Tianjin 300071, China

d Key Laboratory of Original Environmental Pollution Prevention and Control, Ministry of Agriculture and Rural Affairs, Tianjin 300191, China

***Corresponding author 1:** Qixing Zhou

- - **Full postal Address:** College of Environmental Science and Engineering, Nankai University, Tianjin 300350, China
  - **Tel/Fax:** +86 22 23501117 **E-mail:** Zhouqx@nankai.edu.cn

***Corresponding author 2:** Weitao Liu

- - **Full postal Address:** College of Environmental Science and Engineering, Nankai University, Tianjin 300350, China
  - **Tel/Fax:** +86 22 23501117  **E-mail:** lwt@nankai.edu.cn

***Corresponding author 3:** Qiying Lena Ma

- - **Full postal Address:** College of Environmental Sciences and Resources, Zhejiang University, Hangzhou 310058, China
  - **Tel/Fax:** +86 571 88982485 **E-mail:** Lqma@zju.edu.cn

**&** These authors contributed equally to this work and should be considered as co-first authors.

**Contents:**

**Figure S1.** Expression profiles of all differentially expressed genes (DEGs) in wheat shoots (L) and roots (R).

**Figure S2.** Module identification by WGCNA.

**Figure S3.** Genes number assigned to the identified modules.

**Figure S4.** Heatmap of eigengene expression pattern in eight modules.

**Figure S5.** Correlation of MEs and identified metabolites.

**Figure S6.** GO terms enriched from DEGs in wheat shoots.

**Figure S7.** GO terms enriched from DEGSs in wheat roots.

**Table S1.** Primers used for RT-qPCR reactions in the present study.


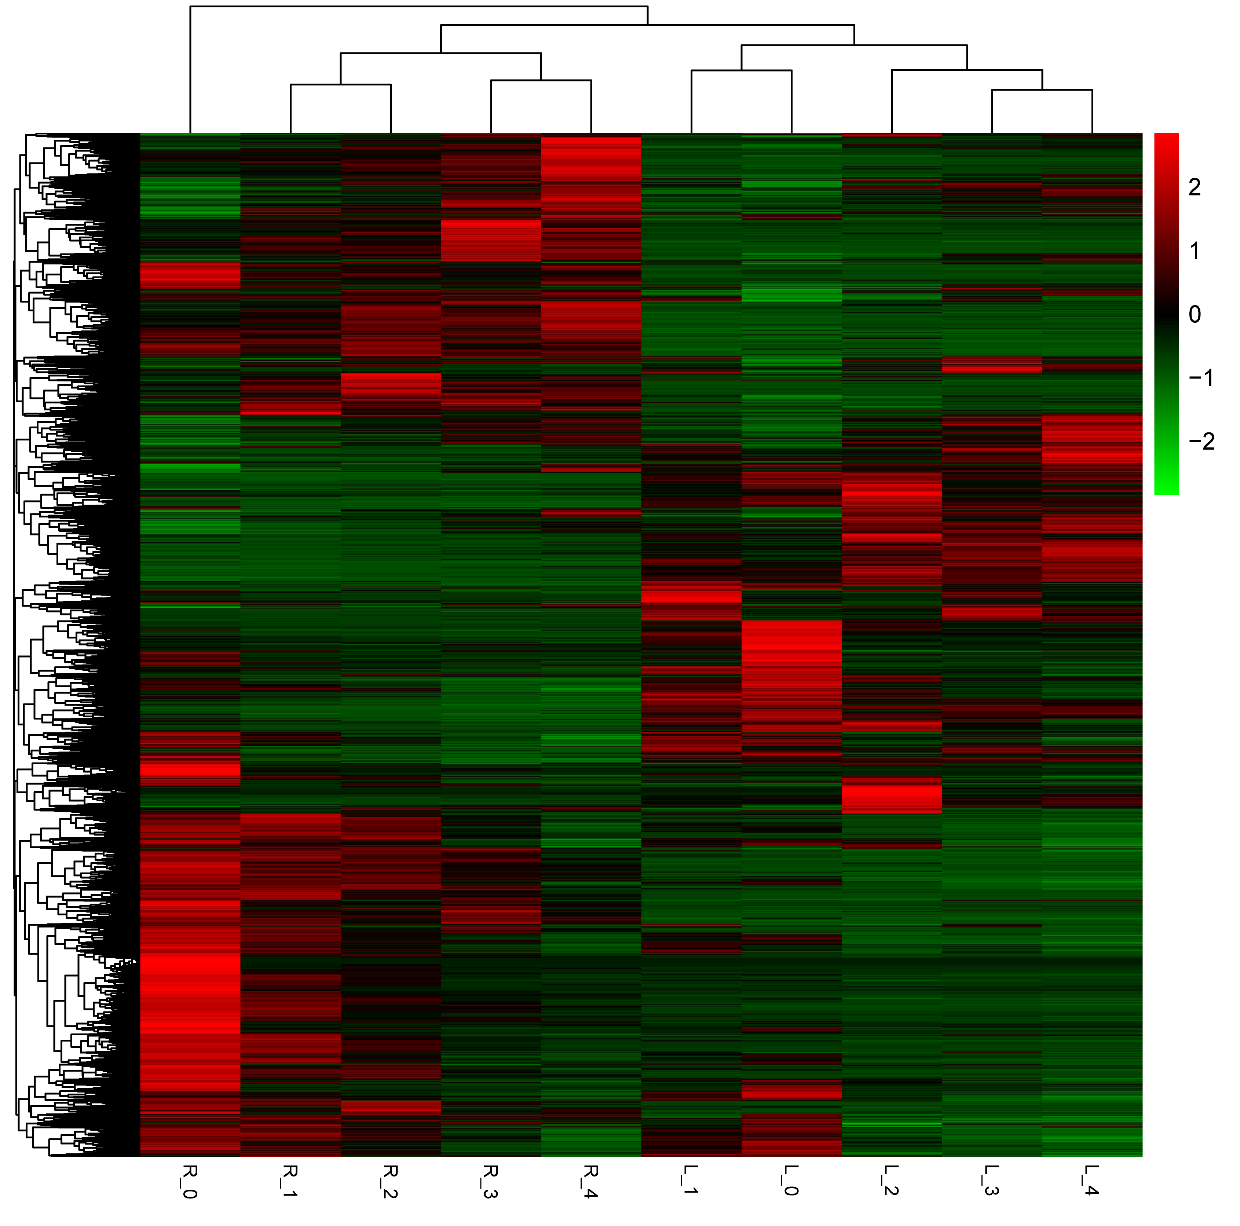


**Figure S1**. Expression profiles of all differentially expressed genes (DEGs) in wheat shoots (L) and roots (R). All the gene expression values were calculated using a log2 FPKM transformation. Red color shows the high expression of the gene in this sample, while green color indicates the low gene expression.


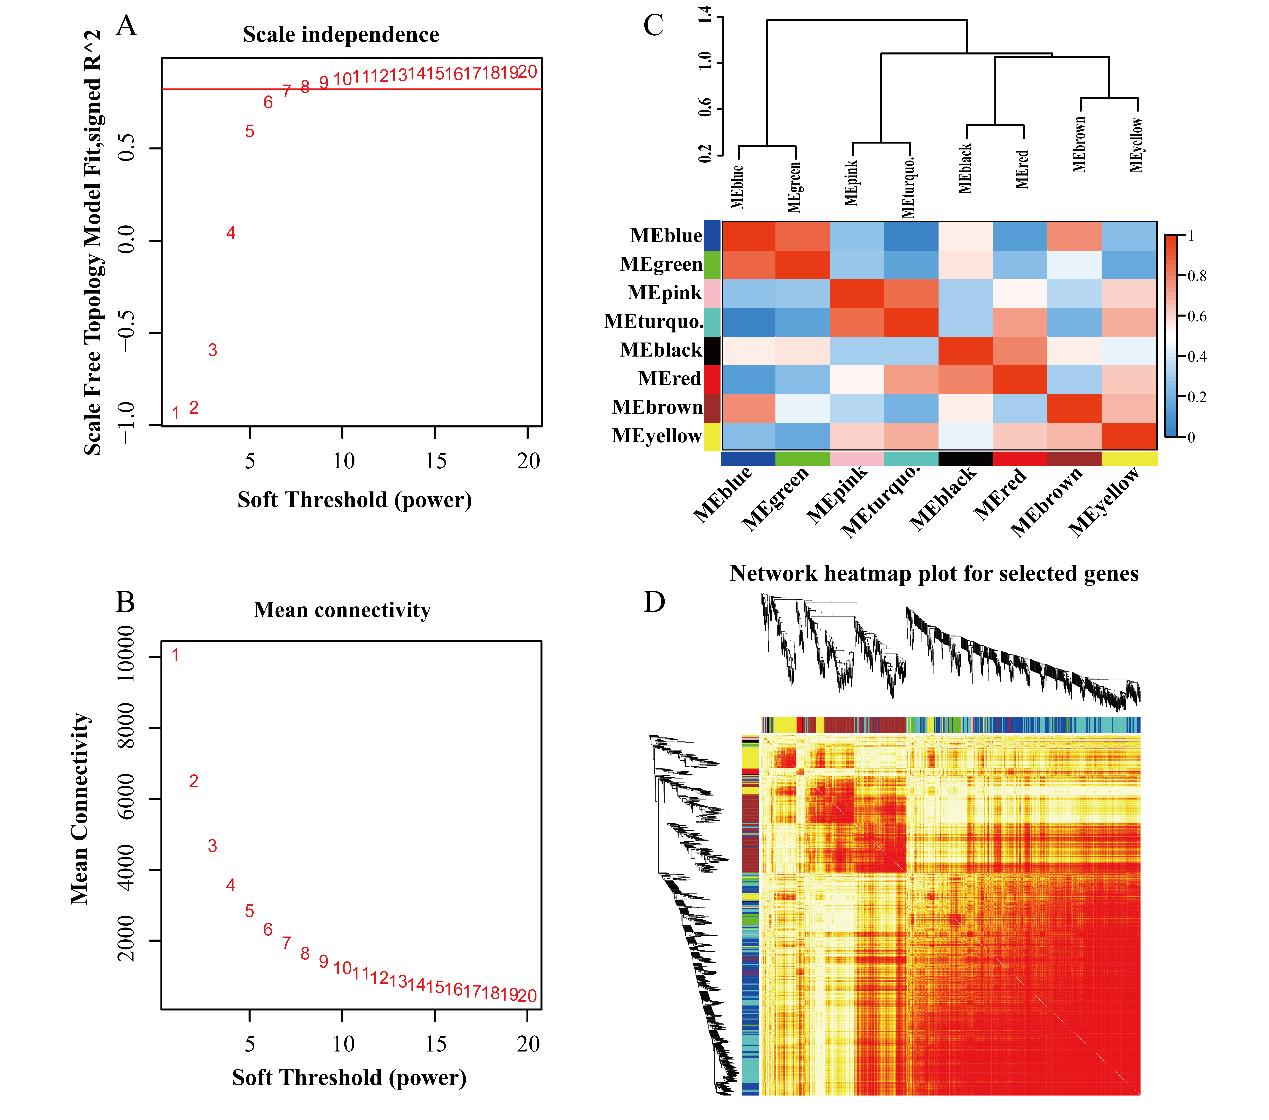


**Figure S2**. Module identification by WGCNA. (A, B) Selection of the soft threshold with scale independence and mean connectivity. (C) Cluster dendrogram of the eight modules. The red color implies that these two modules are highly related, while the blue indicates low correlation between corresponding two modules. (C) Network heatmap of all eigengenes in the modules.





**Figure S3.** Genes number assigned to the identified modules.


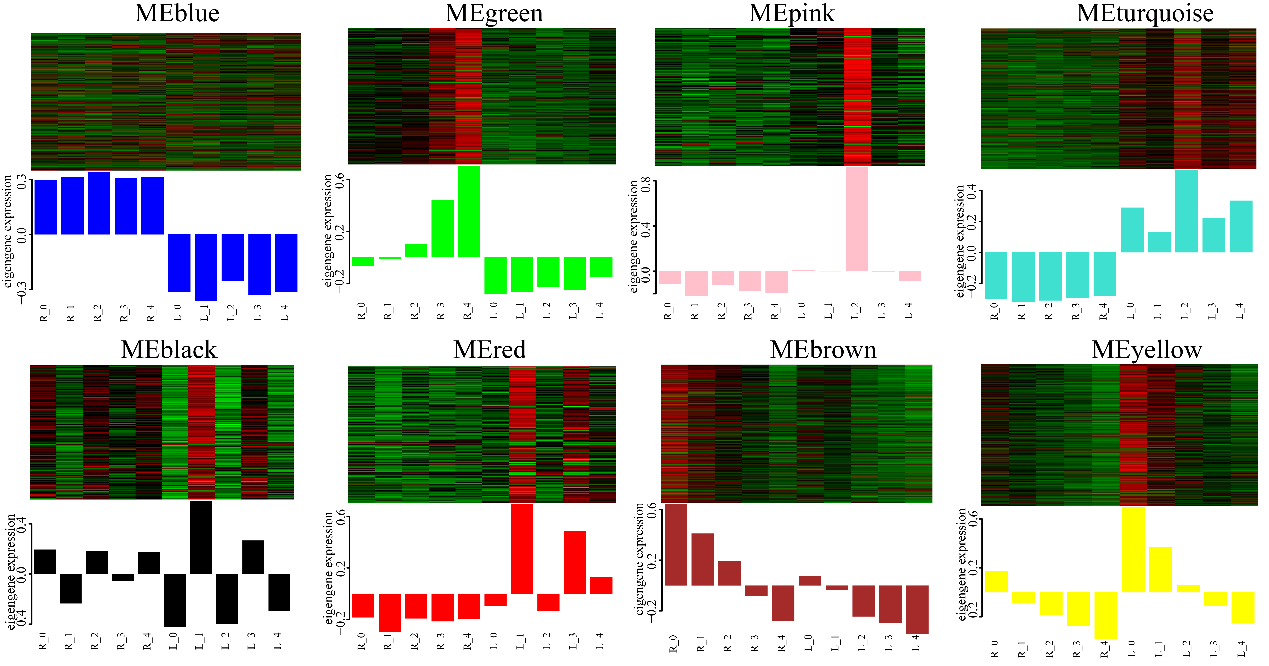


**Figure S4.** Heatmap of eigengene expression pattern in eight modules.


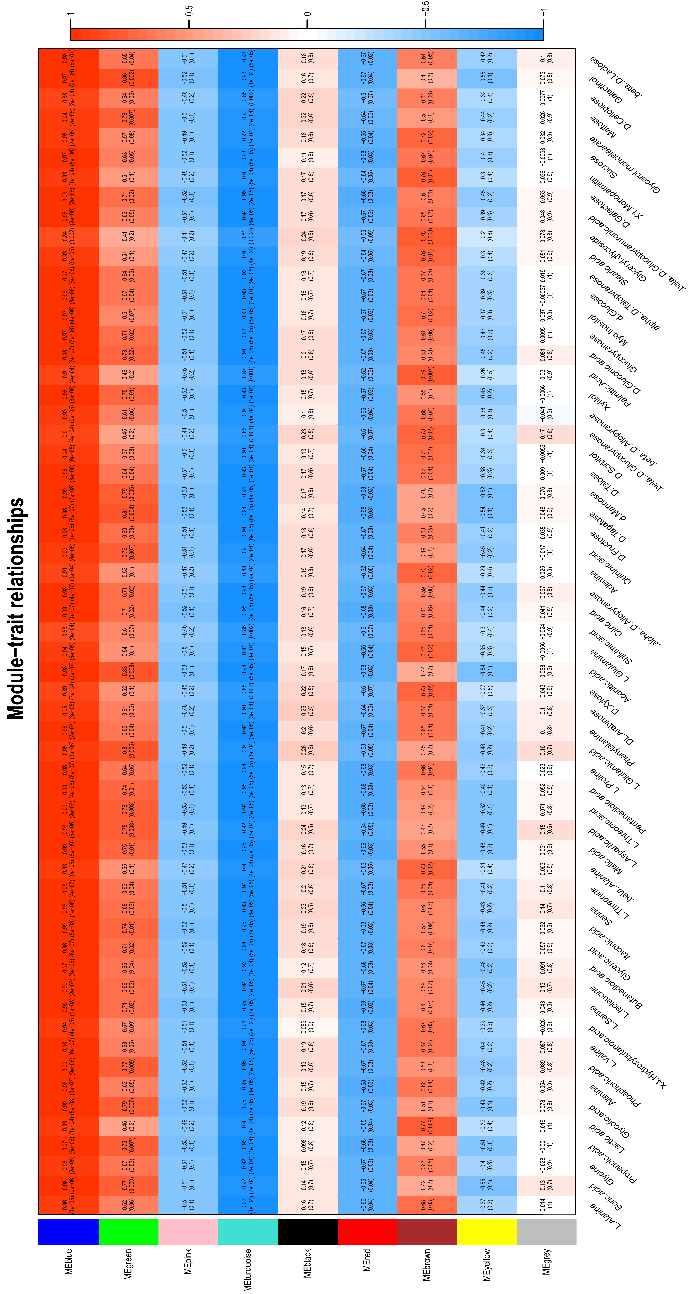


**Figure S5**. Correlation of MEs and identified metabolites. Upper number in each grid represents the correlation coefficient (Red color: high correlation; Blue color: low correlation), while the lower number is the *p*-value of statistical significance.


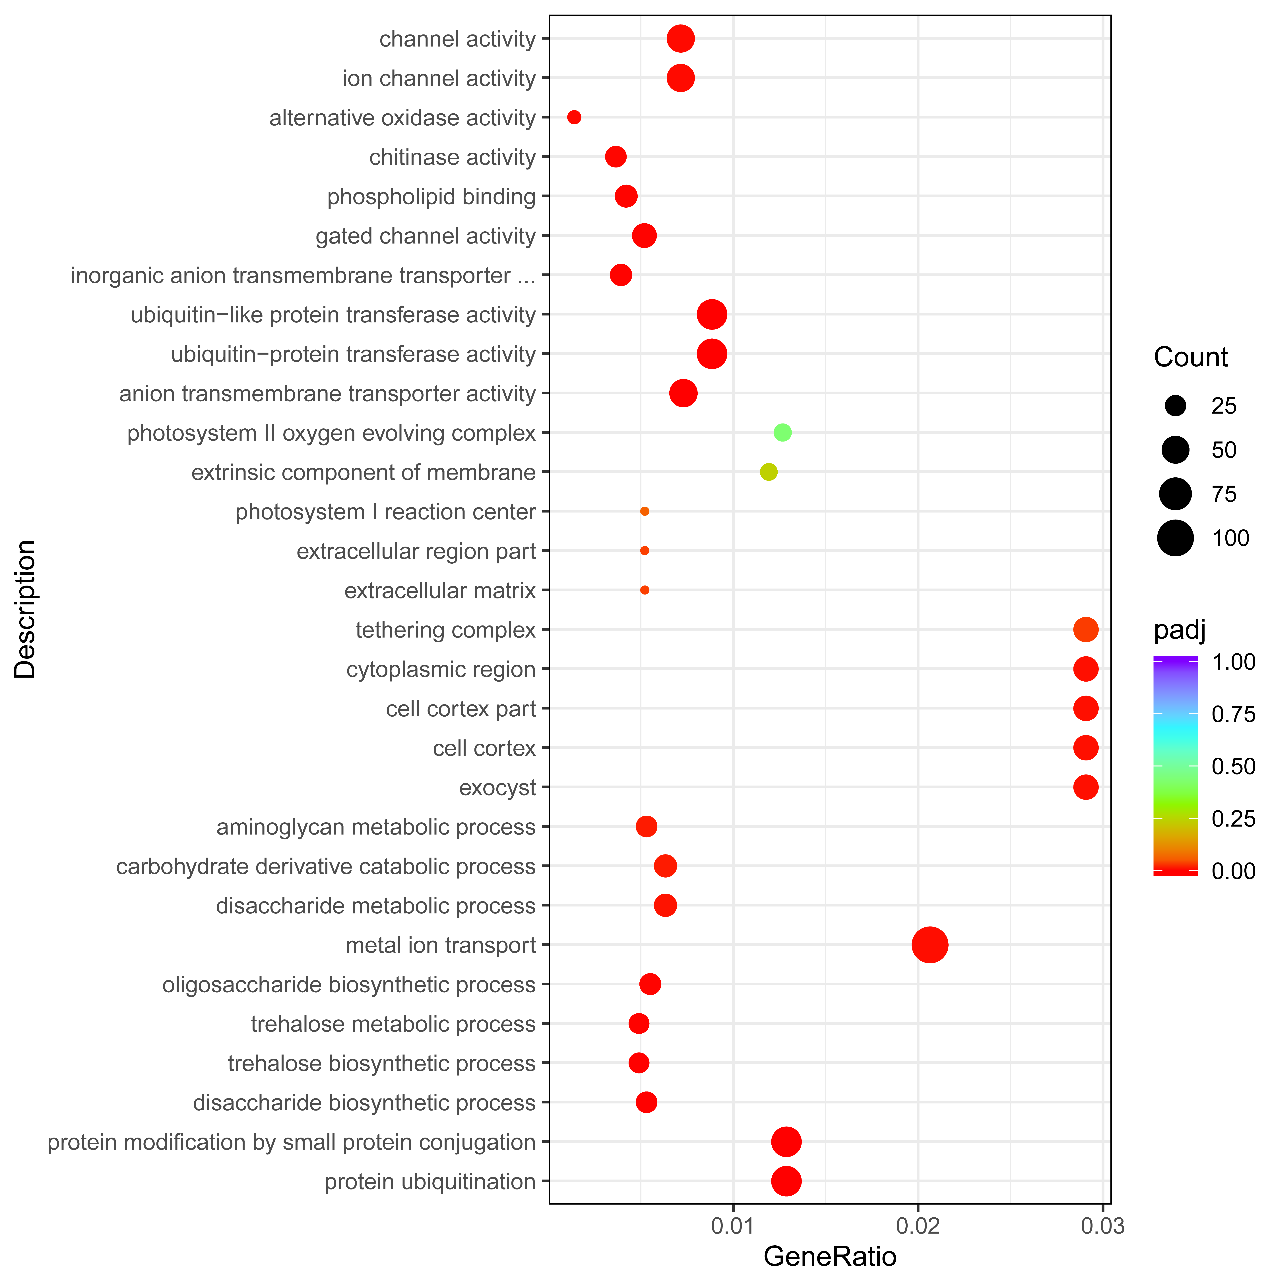


**Figure S6.** GO terms enriched from differentially expressed genes in wheat shoots (DEGs). The dot size means the number of gene including in this term, and the dot color represents the statistical significance (Red: the lowercorrected *p*-value; Purple: non-significant).


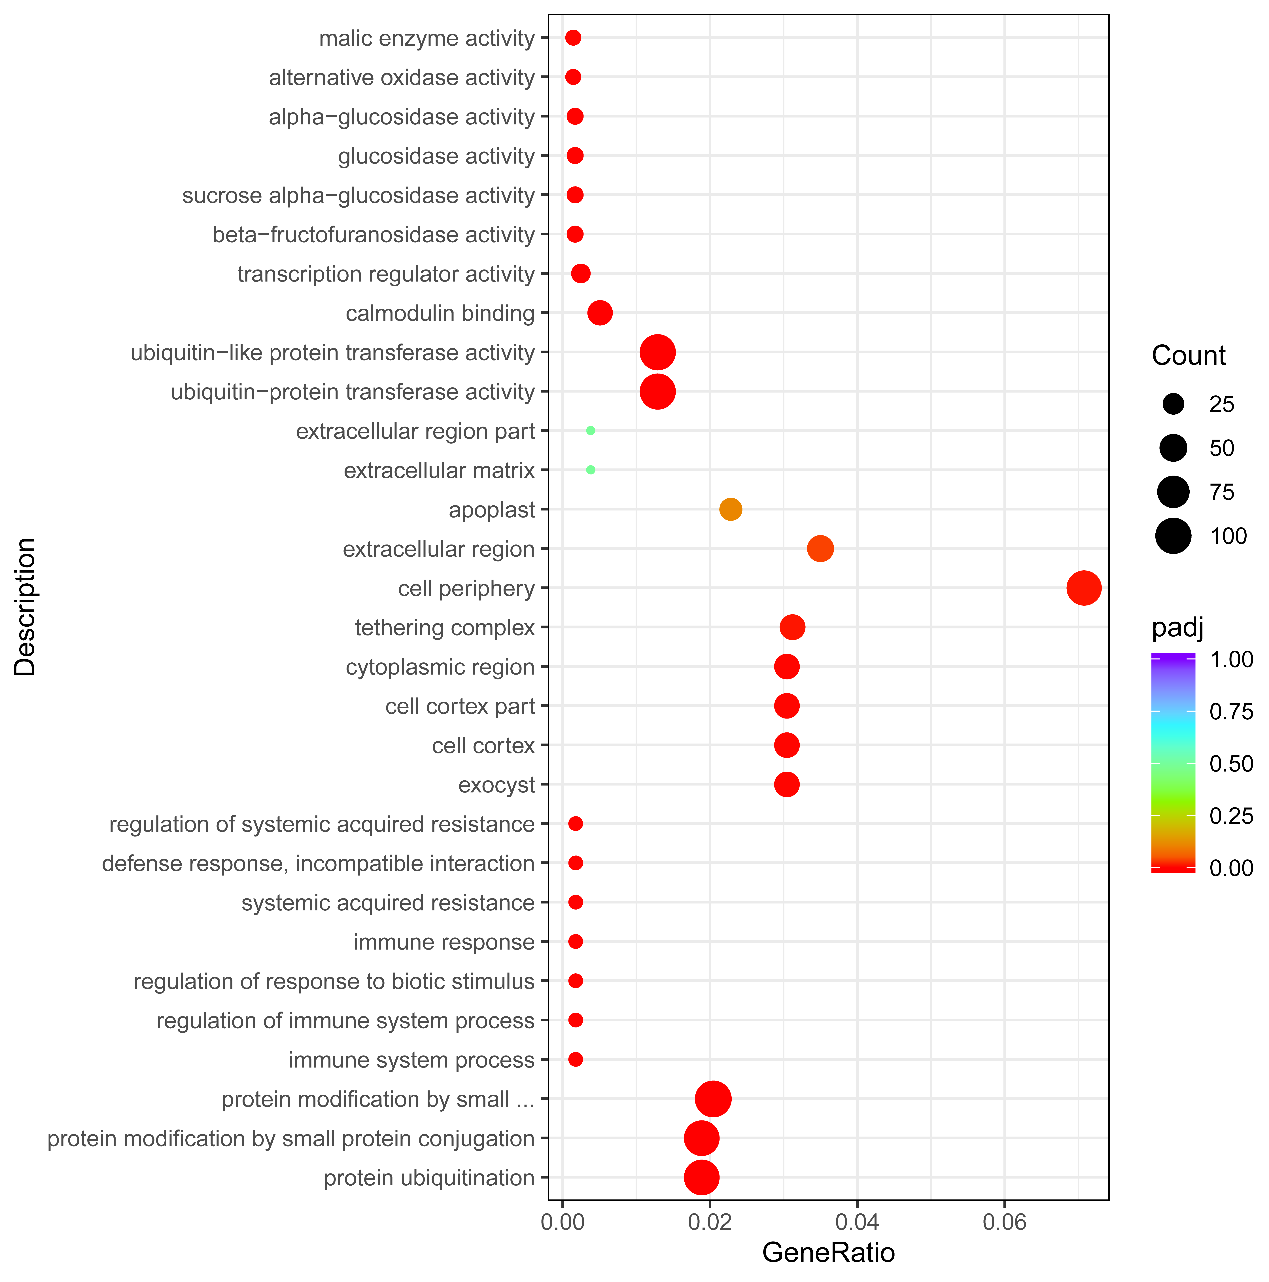


**Figure S6.** GO terms enriched from differentially expressed genes in wheat roots (DEGs). The dot size means the number of gene including in this term, and the dot color represents the statistical significance (Red: the lowercorrected *p*-value; Purple: non-significant).

**Table S1.** Primers used for RT-qPCR reactions in the present study.

| Gene ID | Forward/Reverse | Primer Sequences |
| --- | --- | --- |
| *TraesCS1D02G191100* | F | CGTGGTGCTCAACCTCAAG |
| R | TGACCTGGGACTCGTTCAC |
| *novel.6771* | F | TTCTTTCCTGTTGGTGCGATTC |
| R | TGCTGGAGTTGGCTGTGAG |
| *TraesCS3D02G005500* | F | GGATGGGCTGTGGGATGTG |
| R | CTATTCCGTGCTCATTGCTCTG |
| *TraesCS6B02G056800* | F | CAACACCTACACCTTCGTCTC |
| R | GCGTGGCTGTGGTTCTTG |
| *TraesCS7D02G549900* | F | GGCGAGAACATCAAGGAGAAG |
| R | GTGTCCCGACTTCCCGTAG |
| *TraesCS6B02G386500* | F | ACTCTCCAGTGAGCCAAGG |
| R | GAAGAGCCAGCACGAACAG |
| *TraesCS4A02G419800* | F | CAGGCTCCAGCATTCAGATTC |
| R | GTAGGACAGTTCTTGGTCACAC |
| *novel.6813* | F | TTGAATCCACTCTGGTTAGATGAC |
| R | TTGGCTCCTAATGGGTTCCTG |
| *TraesCS4A02G042100* | F | GGTGGGTGTTCATGTACTTCTTC |
| R | GCTCGGTGGACCTCTTGC |
| *TraesCS4A02G173300* | F | CCAGAGTGTCATGGATGGATATTC |
| R | CATAGGAGATGGCAGCAGAGG |
| *β-Actin* | F | GGAATCCATGAGACCACCTAC |
| R | GACCCAGACAACTCGCAAC |
